# Supplementary material for: Syntax and prejudice: ethically-charged biases of a syntax-based hate speech recognizer unveiled
Source: PeerJ journal article supplement (doi:10.7717/peerj-cs.859), 2022-02-03
Supplement: AppendixA.pdf [file AppendixA.pdf]

523 **A RANKING OF THE MOST USED HASHTAGS ON THE CAMPAIGN TRAIL**  
 524 **BY THE DEMOCRATIC AND REPUBLICAN PARTIES**

525 Table 6 shows the most used hashtags by the Democratic and Republican parties during the November  
 526 2020 Presidential campaign. In detail, for each party we selected the verified Twitter account of: the  
 527 presidential candidate, the vice president candidate and their political party (as shown in Tab. 2 and  
 528 discussed in Section 3.4.3) and extracted from each Twitter profile, the most frequent hashtags and  
 529 slogans.

| Political party         | Hashtag                                                |
|-------------------------|--------------------------------------------------------|
| <i>Democratic party</i> | #Harris2020                                            |
|                         | #KamalaHarris                                          |
|                         | #Biden2020                                             |
|                         | #BidenHarris2020                                       |
|                         | #Democrats                                             |
|                         | #VoteBlue                                              |
|                         | #BidenHarrisToSaveAmerica<br>#JoeBidenKamalaHarris2020 |
| <i>Republican party</i> | #maga                                                  |
|                         | #maga2020                                              |
|                         | #MakeAmericaGreatAgain                                 |
|                         | #promisekept                                           |
|                         | #promisemade                                           |
|                         | #GOP                                                   |
|                         | #4MoreYears                                            |
|                         | #FourMoreYears                                         |
|                         | #Trump2020                                             |
|                         | #VoteRed                                               |
| #TrumpPence2020         |                                                        |

**Table 6.** Most used hashtags on the campaign trail by the Democratic and republican parties
