# Supplementary material for: Syntax and prejudice: ethically-charged biases of a syntax-based hate speech recognizer unveiled
Source: PeerJ journal article supplement (doi:10.7717/peerj-cs.859), 2022-02-03
Supplement: AppendixB.pdf [file AppendixB.pdf]

530 **B US PRESIDENTIAL ELECTION CORPUS COMPOSITION AND COMPARI-**  
 531 **SON WITH THE NATIONAL EXIT POLLS**

532 In the list below we show tweets geolocation within the *US presidential election corpus* (Sec.3.4.3) and  
 533 compare them with the National Exit Polls. We only show:

- 534 1. States those constitute at least 1% of tweets in at least one of the two datasets.  
 535 2. states with a larger gap in the two datasets.

536 The list is in alphabetical order. Blue rows denote states won by *Democratic party* while red rows  
 537 denote those won by *Republican party*.

| State          | <i>GOP dataset</i> | <i>DEM dataset</i> |
|----------------|--------------------|--------------------|
| Alabama        | <b>0.45%</b>       | 0.33%              |
| Arizona        | <b>1.54%</b>       | 1.22%              |
| California     | 13.25%             | <b>16.71%</b>      |
| Colorado       | 1.13%              | <b>1.21%</b>       |
| Connecticut    | 0.42%              | <b>0.49%</b>       |
| Florida        | <b>10.40%</b>      | 6.47%              |
| Georgia        | 1.40%              | <b>1.96%</b>       |
| Illinois       | 2.17%              | <b>2.86%</b>       |
| Kentucky       | <b>0.70%</b>       | 0.65%              |
| Maryland       | 0.63%              | <b>1.17%</b>       |
| Massachusetts  | 1.35%              | <b>2.40%</b>       |
| Michigan       | 0.97%              | <b>1.46%</b>       |
| Mississippi    | <b>0.13%</b>       | 0.09%              |
| Montana        | <b>0.12%</b>       | 0.06%              |
| Nebraska       | <b>0.28%</b>       | 0.19%              |
| Nevada         | 1.25%              | <b>1.31%</b>       |
| New Jersey     | 1.92%              | <b>2.00%</b>       |
| New York       | 8.50%              | <b>10.80%</b>      |
| Ohio           | 1.82%              | <b>2.94%</b>       |
| Oregon         | <b>1.17%</b>       | 1.08%              |
| Pennsylvania   | 2.72%              | <b>3.13%</b>       |
| South Carolina | <b>0.64%</b>       | 0.53%              |
| Tennessee      | <b>1.30%</b>       | 0.85%              |
| Texas          | <b>8.46%</b>       | 7.59%              |
| Virginia       | 0.89%              | <b>1.05%</b>       |
| Washington     | 4.08%              | <b>4.77%</b>       |
| Wisconsin      | 0.71%              | <b>0.81%</b>       |
| Total          | 68.40%             | 74.13%             |

State won by ■ Democrats ■ Republicans

**Table 7.** Relation between percentage of tweets in the two datasets and the National Exit Pools results
