# Supplementary material for: Syntax and prejudice: ethically-charged biases of a syntax-based hate speech recognizer unveiled
Source: PeerJ journal article supplement (doi:10.7717/peerj-cs.859), 2022-02-03
Supplement: AppendixC.pdf [file AppendixC.pdf]

538 **C REASONS GIVEN TO THE *INSIDE OUT TEST***

539 We analyze all the reasons given by the 10 annotators who participated in the *Inside out test* (Sec.4.1). As  
540 defined within the test, each annotator was asked if they agreed or disagreed with the label given by the  
541 model. The reason was asked when the answer was negative (*No*). Let's remember that in the *Inside out*  
542 *test*, the available tools were: the sentence, the respective label and the syntactic tree colored according to  
543 the activation value of each node.

544 The following table lists the frequency of the reasons given, highlighting how the list is made up of  
545 terms used to mention: ethnic groups, people from a certain geographical area, gender and also proper  
546 names.

| Word       | Frequency |
|------------|-----------|
| Black      | 47        |
| African    | 11        |
| Racist     | 10        |
| Woman      | 10        |
| Gay        | 8         |
| Mexicans   | 8         |
| White      | 6         |
| Stuttering | 6         |
| Democrats  | 5         |
| Worst      | 5         |
| Israel     | 4         |
| Squat      | 4         |
| Trump      | 4         |
| President  | 4         |
| Biden      | 3         |
| Weed       | 3         |
| Stupid     | 3         |
| Chinese    | 3         |

**Table 8.** Reasons and their respective frequency given in the *Inside out test*
