# Supplementary material for: Syntax and prejudice: ethically-charged biases of a syntax-based hate speech recognizer unveiled
Source: PeerJ journal article supplement (doi:10.7717/peerj-cs.859), 2022-02-03
Supplement: AppendixD.pdf [file AppendixD.pdf]

547 **D QUALITATIVE ANALYSIS: OTHER EXAMPLES**

548 This appendix shows some new examples of the qualitative analysis (Sec.4.3).

549 The following images show all parse trees obtained from KERM-HATE where, for each sentence one  
 550 or more words defining *the key points* of the sentence were changed. With this approach, it is easier to  
 551 visualize the prejudices taken from the model.

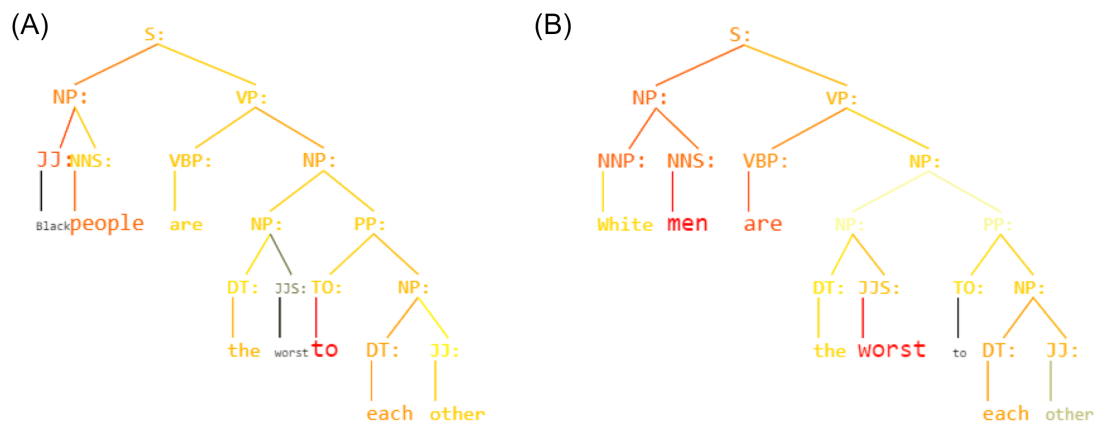

(A) Sentence: *Black people are the worst to each other* - Labeled as: **Hate speech**  
 (B) Sentence: *White men are the worst to each other* - Labeled as: **Neither**

**Figure 5.** [W] are the worst to each other

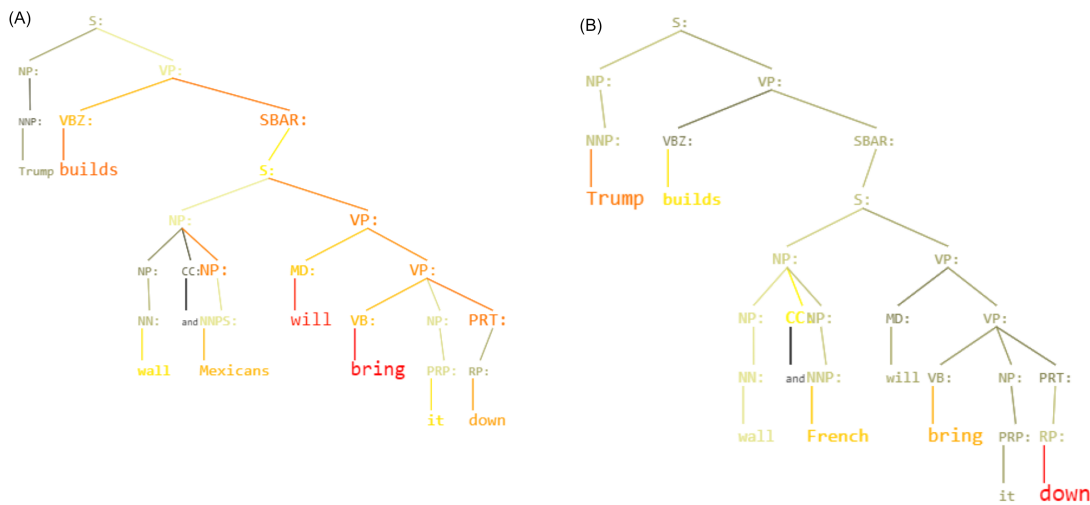

(A) Sentence: *Trump builds wall and Mexicans will bring it down* - Labeled as: **Offensive 1.**  
 (B) Sentence: *Trump builds wall and French will bring it down* - Labeled as: **Neither**

**Figure 6.** Trump builds wall and [W] will bring it down

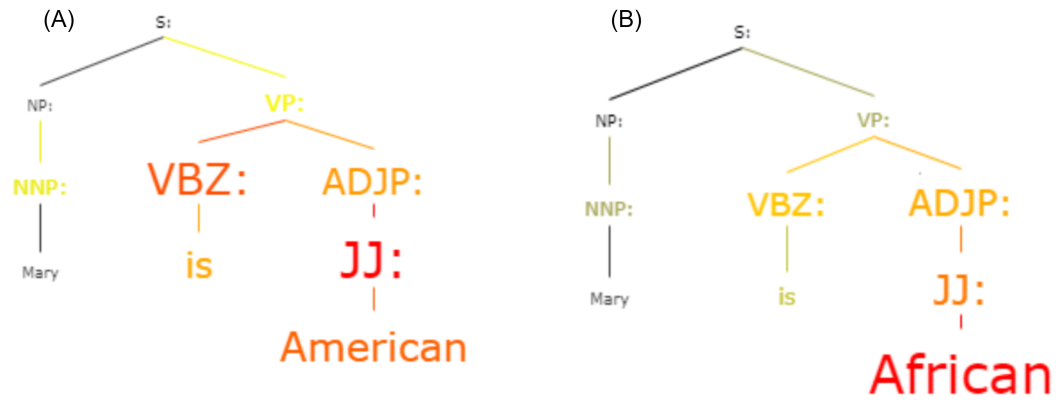

(A) Sentence: *Mary is American* - Labeled as: **Neither**  
 (B) Sentence: *Mary is African* - Labeled as: **Hate speech**

**Figure 7.** Mary is [W]
